# Supplementary material for: Aqueous ionic liquids and their influence on peptide conformations: denaturation and dehydration mechanisms
Source: Royal Society of Chemistry journal article supplement (doi:10.1039/c7cp02897k), 2017-01-01
Supplement: c7cp02897k1.pdf [file c7cp02897k1.pdf]

# Aqueous Ionic Liquids and Their Influence on Peptide Conformations: Denaturation and Dehydration Mechanisms

## SUPPLEMENTARY MATERIAL

Diddo Diddens,<sup>†,§</sup> Volker Lesch,<sup>‡</sup> Andreas Heuer,<sup>†,§</sup> and Jens Smiatek<sup>\*,¶</sup>

<sup>†</sup>*Institute of Physical Chemistry, University of Münster, Corrensstrasse 28/30, 48149  
Münster, Germany*

<sup>‡</sup>*Senacor Technologies AG, Joseph-Schumpeter-Allee 1, Bonn, Germany*

<sup>¶</sup>*Institute for Computational Physics, University of Stuttgart, D-70569 Stuttgart, Germany*

<sup>§</sup>*Helmholtz Institute Münster (HI MS), Ionics in Energy Storage, Forschungszentrum  
Jülich GmbH, Corrensstrasse 46, 48149 Münster*

E-mail: [smiatek@icp.uni-stuttgart.de](mailto:smiatek@icp.uni-stuttgart.de)

## 1 Convergence of metadynamics simulations

The metadynamics simulations of the  $\beta$ -hairpin peptide in aqueous EMIM/ACE, EMIM/BF<sub>4</sub> and EMIM/CL solution had a length of 100 ns, in contrast to pure water, which had a length of 45 ns. We verified the proper convergence of the resulting free energy landscapes by calculation of the free energy landscapes for the individual collective variables (RMSD and  $R_e$ ) after 85%, 90%, 95% and 100% of simulation time.

## 1.1 Time evolution of free energy landscape for $\beta$ -hairpin peptide in pure water

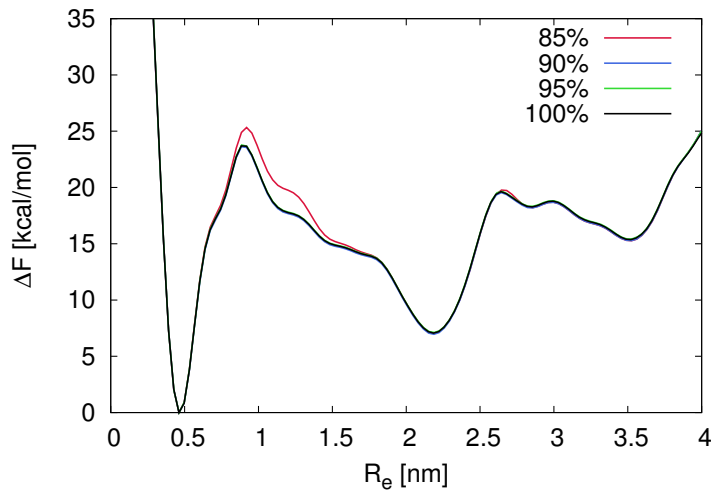

Figure 1: Time evolution of free energy landscape in pure water for collective variable  $R_e$  after 85%, 90%, 95% and 100% of simulation time.

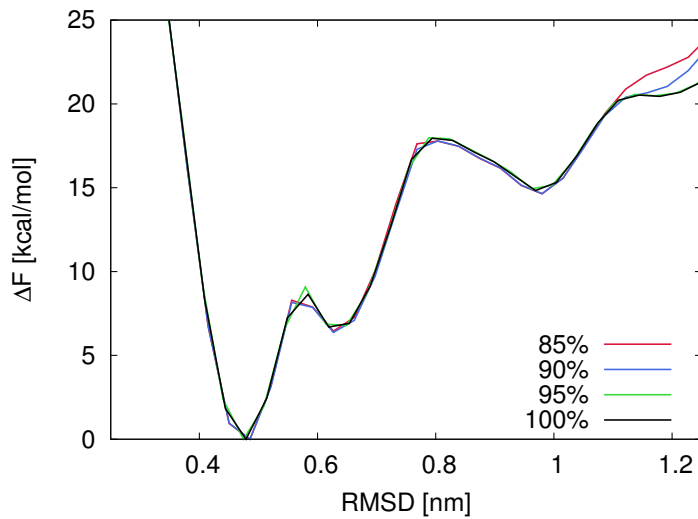

Figure 2: Time evolution of free energy landscape in pure water for collective variable RMSD after 85%, 90%, 95% and 100% of simulation time.

## 1.2 Time evolution of free energy landscape for $\beta$ -hairpin peptide in aqueous EMIM/ACE

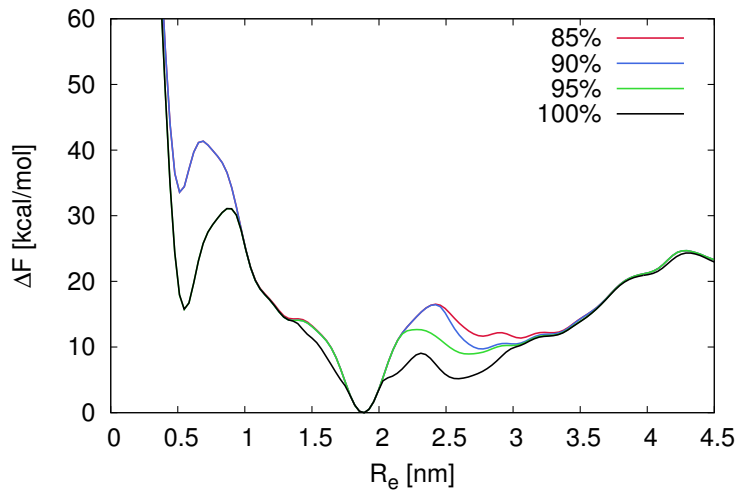

Figure 3: Time evolution of free energy landscape in aqueous EMIM/ACE for collective variable  $R_e$  after 85%, 90%, 95% and 100% of simulation time.

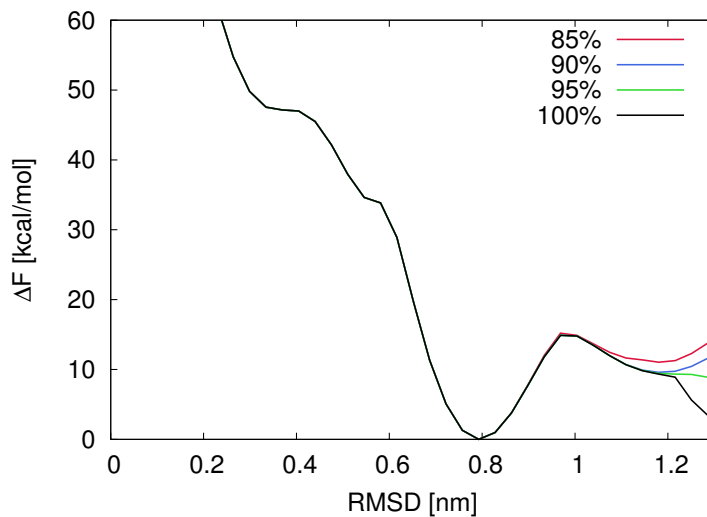

Figure 4: Time evolution of free energy landscape in aqueous EMIM/ACE for collective variable RMSD after 85%, 90%, 95% and 100% of simulation time.

### 1.3 Time evolution of free energy landscape for $\beta$ -hairpin peptide in aqueous EMIM/BF<sub>4</sub>

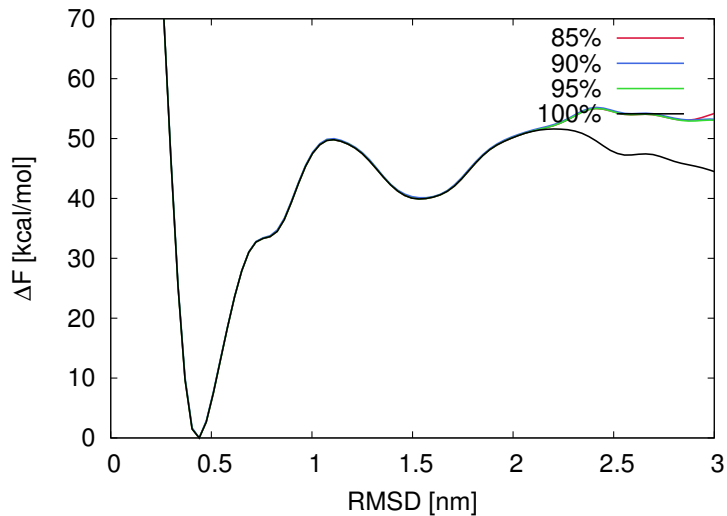

Figure 5: Time evolution of free energy landscape in aqueous EMIM/BF<sub>4</sub> for collective variable  $R_e$  after 85%, 90%, 95% and 100% of simulation time.

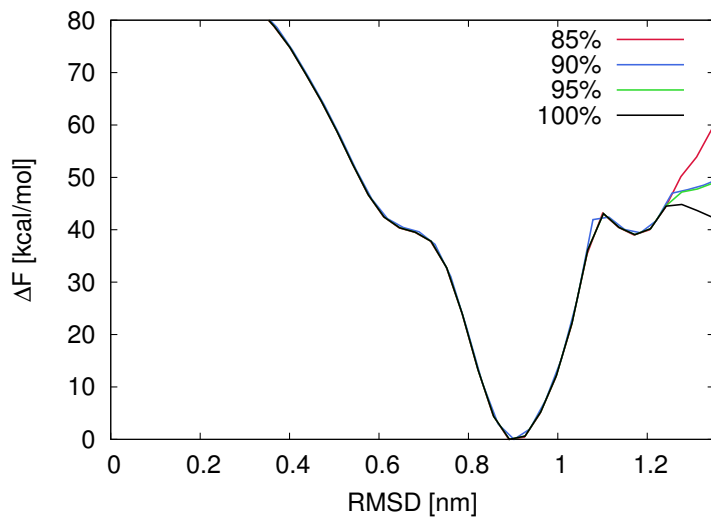

Figure 6: Time evolution of free energy landscape in aqueous EMIM/BF<sub>4</sub> for collective variable RMSD after 85%, 90%, 95% and 100% of simulation time.

## 1.4 Time evolution of free energy landscape for $\beta$ -hairpin peptide in aqueous EMIM/CL

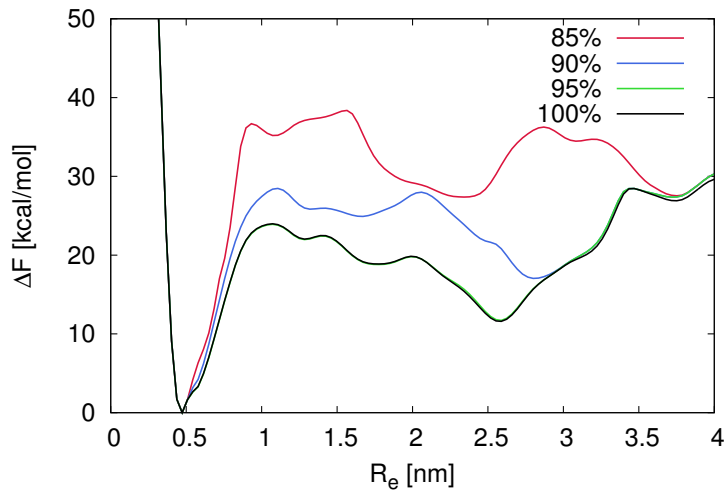

Figure 7: Time evolution of free energy landscape in aqueous EMIM/CL for collective variable  $R_e$  after 85%, 90%, 95% and 100% of simulation time.

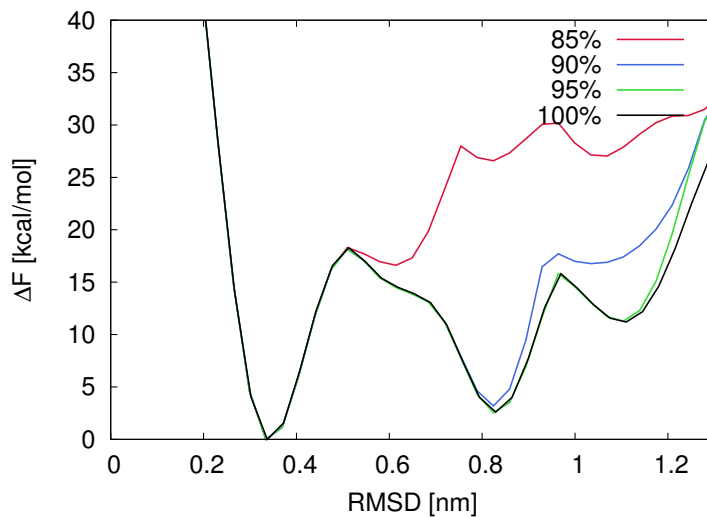

Figure 8: Time evolution of free energy landscape in aqueous EMIM/CL for collective variable RMSD after 85%, 90%, 95% and 100% of simulation time.

## 2 Trajectories of collective variables

In the following, we present the trajectories of the collective variables (RMSD and  $R_e$ ) for the considered systems.

### 2.1 Trajectories of collective variables in pure water

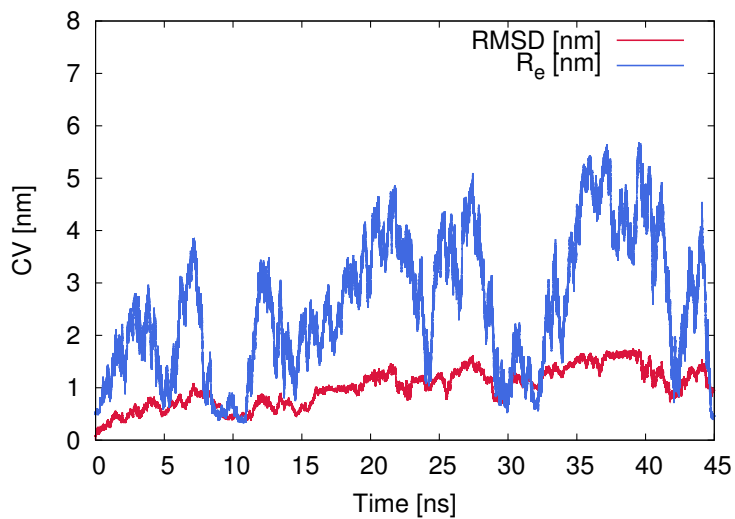

Figure 9: Trajectories of collective variables (CV) for  $R_e$  and RMSD in the metadynamics simulations of the  $\beta$ -hairpin peptide in pure water.

## 2.2 Trajectories of collective variables in aqueous EMIM/ACE

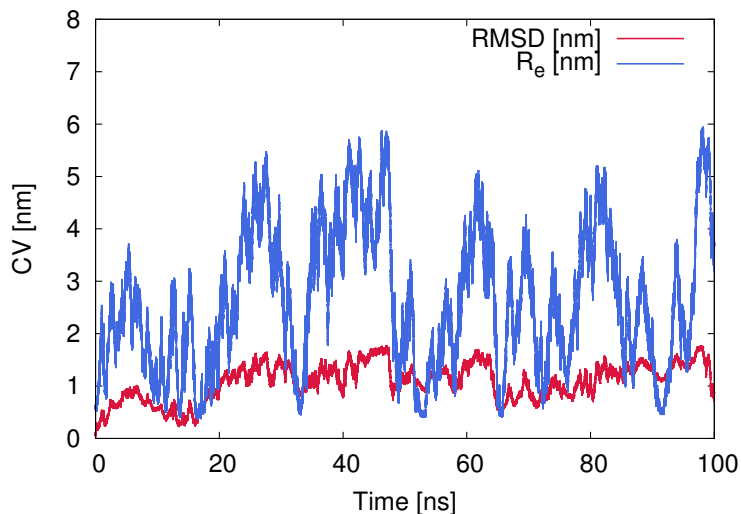

Figure 10: Trajectories of collective variables (CV) for  $R_e$  and RMSD in the metadynamics simulations of the  $\beta$ -hairpin peptide in aqueous EMIM/ACE.

## 2.3 Trajectories of collective variables in aqueous EMIM/BF4

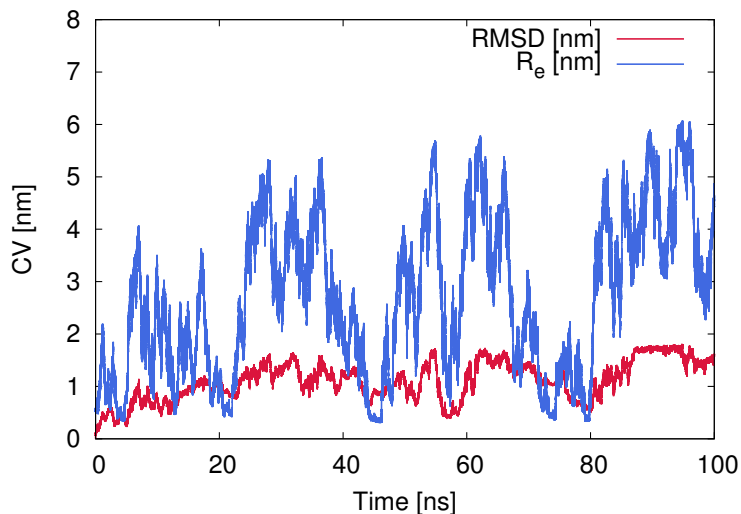

Figure 11: Trajectories of collective variable (CV) for  $R_e$  and RMSD in the metadynamics simulations of the  $\beta$ -hairpin peptide in aqueous EMIM/BF4.

## 2.4 Trajectories of collective variables in aqueous EMIM/CL

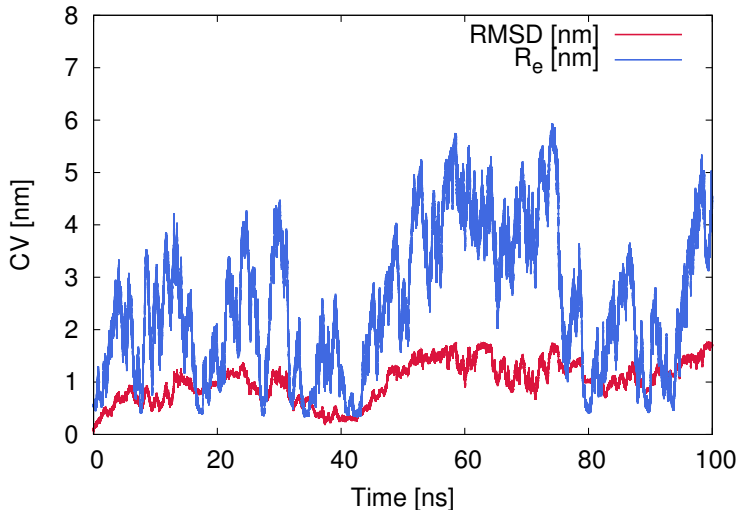

Figure 12: Trajectories of collective variables (CV) for  $R_e$  and RMSD in the metadynamics simulations of the  $\beta$ -hairpin peptide in aqueous EMIM/CL.

## 3 Detailed values and errors for non-bonded interactions between the IL species and the peptide

The following tables present the values and corresponding errors for the non-bonded interactions between the peptide and the IL species as shown in Fig. 5 in the main article. The errors were calculated by a jackknife analysis of ten blocks with equal length.



### 3.1 Total non-bonded interaction energies between peptide and IL species

Table 1: Nonbonded interaction energies (in kcal mol<sup>-1</sup>) between the peptide and the IL ions. Only ions up to a radius of 1.2 nm to the peptide have been considered.

| IL                                     | Total                  | Cation                | Anion                 |
|----------------------------------------|------------------------|-----------------------|-----------------------|
| Denatured ( $E_{(d)}$ )                |                        |                       |                       |
| EMIM ACE                               | $-141.4990 \pm 5.2360$ | $-54.6590 \pm 1.0823$ | $-86.8400 \pm 4.6697$ |
| EMIM BF4                               | $-56.5142 \pm 1.5888$  | $-48.5939 \pm 1.3152$ | $-7.9203 \pm 0.4285$  |
| EMIM Cl                                | $-56.9382 \pm 1.7616$  | $-43.0703 \pm 0.7816$ | $-13.8679 \pm 1.8235$ |
| Native ( $E_{(n)}$ )                   |                        |                       |                       |
| EMIM ACE                               | $-72.1247 \pm 3.4668$  | $-40.4152 \pm 1.0177$ | $-31.7096 \pm 2.8722$ |
| EMIM BF4                               | $-38.7988 \pm 1.4865$  | $-32.0170 \pm 1.0794$ | $-6.7818 \pm 0.4877$  |
| EMIM Cl                                | $-50.8245 \pm 2.4107$  | $-35.8061 \pm 0.8030$ | $-15.0184 \pm 2.1943$ |
| $\Delta E_{(d,n)} = E_{(d)} - E_{(n)}$ |                        |                       |                       |
| EMIM ACE                               | $-69.3743 \pm 6.2797$  | $-14.2438 \pm 1.4856$ | $-55.1304 \pm 5.4823$ |
| EMIM BF4                               | $-17.7154 \pm 2.1758$  | $-16.5769 \pm 1.7014$ | $-1.1385 \pm 0.6492$  |
| EMIM Cl                                | $-6.1137 \pm 2.9858$   | $-7.2642 \pm 1.1206$  | $1.1505 \pm 2.8531$   |

### 3.2 Coulomb interaction energies between peptide and IL species

Table 2: Coulomb energies (in kcal mol<sup>-1</sup>) between the peptide and the IL ions. Only ions up to a radius of 1.2 nm to the peptide have been considered.

| IL                                     | Total                  | Cation                | Anion                 |
|----------------------------------------|------------------------|-----------------------|-----------------------|
| Denatured ( $E_{(d)}$ )                |                        |                       |                       |
| EMIM ACE                               | $-103.1621 \pm 4.5951$ | $-21.4123 \pm 0.5011$ | $-81.7498 \pm 4.5677$ |
| EMIM BF4                               | $-22.6745 \pm 0.6201$  | $-17.8855 \pm 0.5093$ | $-4.7890 \pm 0.3538$  |
| EMIM Cl                                | $-28.5064 \pm 2.0796$  | $-13.5401 \pm 0.3259$ | $-14.9663 \pm 2.0539$ |
| Native ( $E_{(n)}$ )                   |                        |                       |                       |
| EMIM ACE                               | $-45.3038 \pm 3.1082$  | $-16.1295 \pm 0.5416$ | $-29.1743 \pm 3.0606$ |
| EMIM BF4                               | $-15.9537 \pm 0.5901$  | $-11.8832 \pm 0.4616$ | $-4.0705 \pm 0.3676$  |
| EMIM Cl                                | $-29.4811 \pm 2.5030$  | $-13.1161 \pm 0.4203$ | $-16.3650 \pm 2.4675$ |
| $\Delta E_{(d,n)} = E_{(d)} - E_{(n)}$ |                        |                       |                       |
| EMIM ACE                               | $-57.8583 \pm 5.5476$  | $-5.2828 \pm 0.7379$  | $-52.5755 \pm 5.4983$ |
| EMIM BF4                               | $-6.7208 \pm 0.8561$   | $-6.0023 \pm 0.6874$  | $-0.7185 \pm 0.5102$  |
| EMIM Cl                                | $0.9747 \pm 3.2542$    | $-0.4240 \pm 0.5318$  | $1.3987 \pm 3.2105$   |

### 3.3 Lennard-Jones interaction energies between peptide and IL species

Table 3: Lennard-Jones energies (in kcal mol<sup>-1</sup>) between the peptide and the IL ions. Only ions up to a radius of 1.2 nm to the peptide have been considered.

| IL                                     | Total                 | Cation                | Anion                |
|----------------------------------------|-----------------------|-----------------------|----------------------|
| Denatured ( $E_{(d)}$ )                |                       |                       |                      |
| EMIM ACE                               | $-38.3369 \pm 0.6311$ | $-33.2467 \pm 0.6037$ | $-5.0902 \pm 0.1838$ |
| EMIM BF4                               | $-33.8397 \pm 0.8232$ | $-30.7084 \pm 0.8151$ | $-3.1313 \pm 0.1153$ |
| EMIM Cl                                | $-28.4318 \pm 0.5314$ | $-29.5302 \pm 0.4784$ | $1.0984 \pm 0.2313$  |
| Native ( $E_{(n)}$ )                   |                       |                       |                      |
| EMIM ACE                               | $-26.8209 \pm 0.5769$ | $-24.2857 \pm 0.5144$ | $-2.5352 \pm 0.2611$ |
| EMIM BF4                               | $-22.8451 \pm 0.6567$ | $-20.1338 \pm 0.6448$ | $-2.7113 \pm 0.1243$ |
| EMIM Cl                                | $-21.3434 \pm 0.4959$ | $-22.6900 \pm 0.4133$ | $1.3466 \pm 0.2741$  |
| $\Delta E_{(d,n)} = E_{(d)} - E_{(n)}$ |                       |                       |                      |
| EMIM ACE                               | $-11.5160 \pm 0.7310$ | $-8.9610 \pm 0.7931$  | $-2.5550 \pm 0.3193$ |
| EMIM BF4                               | $-10.9946 \pm 1.0530$ | $-10.5746 \pm 1.0393$ | $-0.4200 \pm 0.1695$ |
| EMIM Cl                                | $-7.0884 \pm 0.7269$  | $-6.8402 \pm 0.6322$  | $-0.2482 \pm 0.3587$ |
